# Supplementary material for: Light-mediated in cell downregulation of G-quadruplex-containing genes using a photo-caged ligand
Source: Royal Society of Chemistry journal article supplement (doi:10.1039/c3cc44737e), 2013-01-01

## Supporting information

for

### **Light-mediated *in cell* downregulation of G-quadruplex-containing genes using a photo-caged ligand.**

Pierre Murat, Michael V. Gormally, Debbie Sanders, Marco Di Antonio  
and Shankar Balasubramanian

|                                                                            |    |
|----------------------------------------------------------------------------|----|
| Experimental procedures.....                                               | p1 |
| Synthesis and characterisation of [C]-PDS.....                             | p3 |
| Kinetic of photo-deprotection of [C]-PDS .....                             | p5 |
| Cell viability assay in presence of PDS and [C]-PDS .....                  | p6 |
| Influence of UV light on MRC5-SV40 cells viability.....                    | p6 |
| Influence of UV light on gene expression.....                              | p7 |
| Light-mediated downregulation of mRNAs of quadruplex-containing genes..... | p7 |

#### **Experimental procedures**

*Synthesis:* Commercial reagents were used as received unless otherwise noted. 4,5-Dimethoxy-2-nitrobenzyl bromide, *N,N*-Diisopropylethylamine was purchased from *Aldrich*. NMR spectra were acquired on a Bruker® DRX-500 instrument using deuterated solvents as detailed and at ambient probe temperature (300 K). Notation for the <sup>1</sup>H NMR spectral splitting patterns includes: singlet (*s*), doublet (*d*), triplet (*t*), broad (*br*) and multiplet/overlapping peaks (*m*). Signals are quoted as  $\delta$  values in ppm, coupling constants (*J*), are quoted in Hertz and approximated to the nearest 0.5. Data analysis for the nuclear magnetic resonance (NMR) spectra was performed using MestReNova® software. Mass spectra were recorded on a Micromass® Q-Tof (ESI) spectrometer. High performance liquid chromatography (HPLC) purification was carried out by using a Varian Pursuit C18, 5  $\mu$  column (250  $\times$  21.2 mm) and a gradient elution with H<sub>2</sub>O/ acetonitrile (MeCN) containing 0.1% TFA at a flow rate of 12.0 ml/ min. Tandem HPLC-MS analysis was performed on a *Bruker* amaZon X Ion Trap MS and chromatographed by a *Dionex* UltiMate 3000 UHPLC system equipped with a diode array detector and a column oven. HPLC analyses were performed on a Kinetex C18 column (*Phenomenex*, 50  $\times$  2.1 mm, 2.6  $\mu$ m) using the following solvent system: solvent A, 0.1 % Formic acid in water; solvent B, CH<sub>3</sub>CN; flow rate of 1 mL.min<sup>-1</sup>; using the following gradient (0 min: 2% of B  $\rightarrow$  1.5 min: 5% of B  $\rightarrow$  2.5 min: 95% of B  $\rightarrow$  3.5 min: 95 of B). The column temperature was maintained at 30 °C.

*In vitro photo-deprotection of [C]-PDS:* 500  $\mu$ L of a 100  $\mu$ M solution of [C]-PDS in a 10 mM PBS buffer pH 7.0 supplemented with 70 mM KCl, in a quartz cell (*l* = 1 cm). The cell was then placed 3 cm from the UV lamp (*Spectroline* ENF-280C/FE, AC

230V, 8W, long wave UV-365nm). The sample was irradiated through the cell while the solution was stirred.

*FRET-melting studies:* 100  $\mu$ M stock solutions of oligonucleotides were prepared in molecular biology grade DNase-free water. Further dilutions were carried out in 60 mM potassium cacodylate buffer, pH 7.4. FRET experiments were carried out with a 200 nM oligonucleotide concentration. All labeled DNA oligonucleotides were supplied by Eurogentec® Ltd. Three dual fluorescently labeled DNA oligonucleotides were used in these experiments: SRC (5'-FAM-GGG CGG CGG GCT GGG CGG GG-TAMRA-3'), H-Telo (5'-FAM-GGG TTA GGG TTA GGG TTA GGG-TAMRA-3'), C-myc (5'-FAM-TGA GGG TGG GTA GGG TGG GTA A- TAMRA-3'). The donor fluorophore was 6-carboxyfluorescein (FAM) and the acceptor fluorophore was 6-carboxytetramethylrhodamine (TAMRA). The dual-labeled oligonucleotides were annealed at a concentration of 400 nM by heating at 95 °C for 10 min followed by slow cooling to RT. 96-well plates were prepared by addition of 50  $\mu$ l of the annealed DNA solution to each well, followed by 50  $\mu$ l solution of [C]-PDS. Measurements were made in triplicate with an excitation wavelength of 483 nm and a detection wavelength of 533 nm.

*Cell culture:* MRC5-SV40 cells were cultured in T-75 flasks in Phenol Red free Dulbecco's Modified Eagle's Medium (DMEM) supplemented with 10% fetal calf serum and split at 70–80% confluency using trypsin EDTA. The MRC5-SV40 cells were a gift from the laboratory of Prof Steve Jackson.

*Luminescent cell viability assay:* IG50 values of growth inhibition were determined using the cell viability assay CellTiter-Glo™ (Promega®). Cells were plated in 96 well plates at a density of 5000 cells per well in 100  $\mu$ L of media and incubated for 24 h. Compounds were added in serial dilutions (in a range between 0–40  $\mu$ M) at a volume of 100  $\mu$ l per well at the respective concentrations. The plates were then placed 3 cm apart from the UV lamp (Spectroline ENF-280C/FE, AC 230V, 8W, long wave UV-365nm) and irradiated for the indicated times. Cell viability was measured after 72 h using the manufacturer's protocol. All measurements were made in triplicate.

*Gene expression / mRNA analysis:* MRC5-SV40 cells were plated in 96 well plates at a density of 10 000 cells per well in 100  $\mu$ L of media. The cells were either treated or untreated with 2  $\mu$ M [C]-PDS. Total RNA was purified from each sample using an RNeasy kit from Qiagen following the manufacturer's protocol. cDNA synthesis of 1  $\mu$ g of total RNA was performed with the Thermo Scientific Maxima Reverse Transcriptase kit using oligo(dT) primers following the manufacturer's protocol for GC-rich RNA. For quantitative Real-Time PCR (qRT-PCR) analyses, 1/30th of each reaction was used. The following gene specific Quantitect primer assays (Qiagen, cat. number included) were used in our analysis: *B2M* (QT00088935), *ALAS1* (QT0073122), *MYC* (QT00035406), *NOTCH1* (QT01005109), *RET* (QT00047985), *SRC* (QT00039326). RT-PCR analysis was performed using Power SYBR® green (Applied Biosystems) for detection with an CFX96™ Real-Time system (BioRad). All measurements were made in technical and biological triplicate.

## Synthesis and characterisation of [C]-PDS

**PDS** was synthesized as reported in: Rodriguez, R.; Müller, S.; Yeoman, J. A.; Trenteseaux, C.; Rio, J.-F.; Balasubramanian, S. *J. Am. Chem. Soc.* **2008**, *130*, 15758.

**PDS** (20 mg, 33.6  $\mu\text{mol}$ ) was mixed in DMF (5 mL) with 1 eq 4,5-Dimethoxy-2-nitrobenzyl bromide (5.88 mg). TEA (100  $\mu\text{L}$ , 260 mmol) was added and the mixture was stirred at RT overnight. The major compound was then purified by HPLC (Gradient: 10 % ACN in  $\text{H}_2\text{O}$  containing 0.1 % TFA to 90 % ACN over 20 min) to recover **[C]-PDS** as a white powder (22.7 mg, 28.6  $\mu\text{mol}$ , 85.1 %) after the solvents have been freeze-dried.  $^1\text{H}$  NMR (500 MHz,  $\text{CD}_3\text{OD}$ )  $\delta_{\text{H}}$  8.44 (*dd*,  $J = 7.2, 4.4$  Hz, 2H), 8.20 (*s*, 2H), 8.17 (*d*,  $J = 4$  Hz, 2H), 7.98 (*d*,  $J = 8.4$  Hz, 2H), 7.85 (*t*,  $J = 7.2$  Hz, 2H), 7.83 (*s*, 1H), 7.61 (*dd*,  $J = 7.2, 12.0$  Hz, 2H), 7.31 (*s*, 1H), 4.84 (*t*,  $J = 4.8$  Hz, 2H), 4.73 (*s*, 2H), 4.70 (*t*,  $J = 4.4$  Hz, 2H), 4.62 (*t*,  $J = 4.8$  Hz, 2H), 4.00 (*s*, 3H), 3.97 (*t*,  $J = 4.8$  Hz, 2H), 3.95 (*s*, 3H), 3.67 (*t*,  $J = 4.4$  Hz, 2H), 3.54 (*t*,  $J = 4.8$  Hz, 2H);  $^1\text{H}$  NMR (125 MHz,  $\text{CD}_3\text{OD}$ )  $\delta_{\text{C}}$  168.9, 164.3, 164.2, 163.9, 163.1, 162.8, 155.4, 153.0, 152.9, 151.6, 147.9, 142.9, 132.4, 127.6, 126.5, 123.4, 121.8, 120.6, 116.5, 113.5, 109.8, 95.9, 66.6, 65.4, 57.2, 56.9, 50.7, 48.2, 39.9, 39.8; HRMS (ES) calculated for  $\text{C}_{40}\text{H}_{41}\text{N}_9\text{O}_9\cdot\text{H}^+$ : 792.3027, found 792.2349.

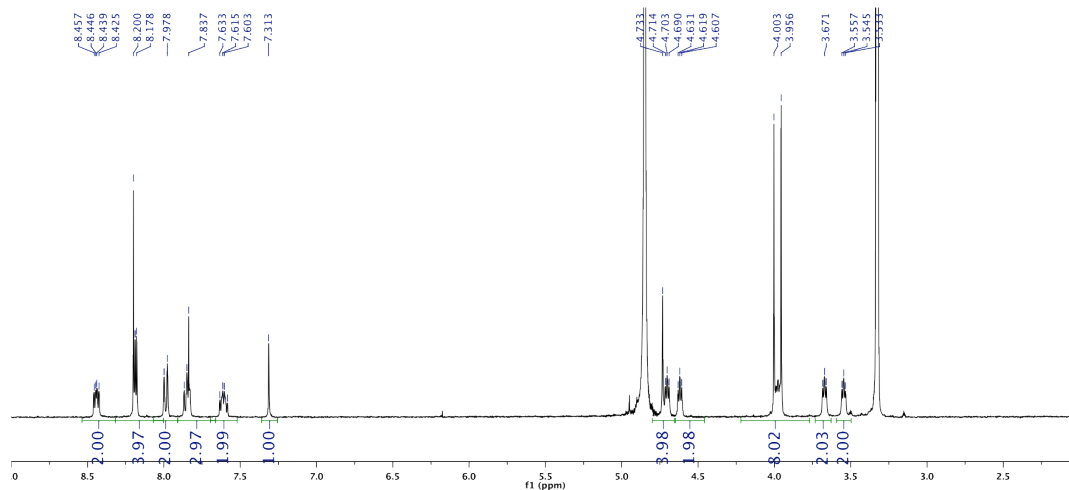

[C]-PDS  $^1\text{H}$  NMR spectrum

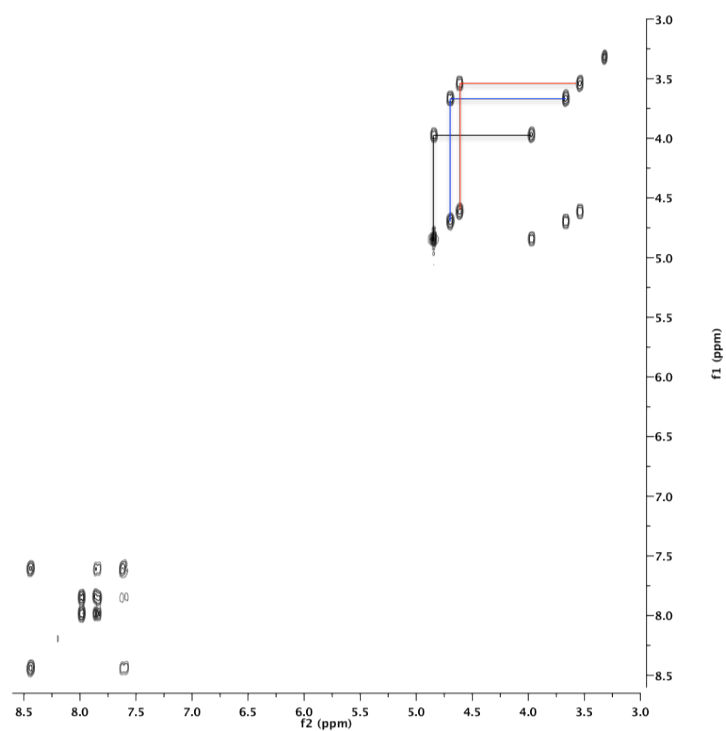

**[C]-PDS** COSY NMR spectrum. The three highlighted correlations show the non-equivalence of the three side-chains of **[C]-PDS** therefore supporting the structure of the isomer reported in **Scheme 1**.

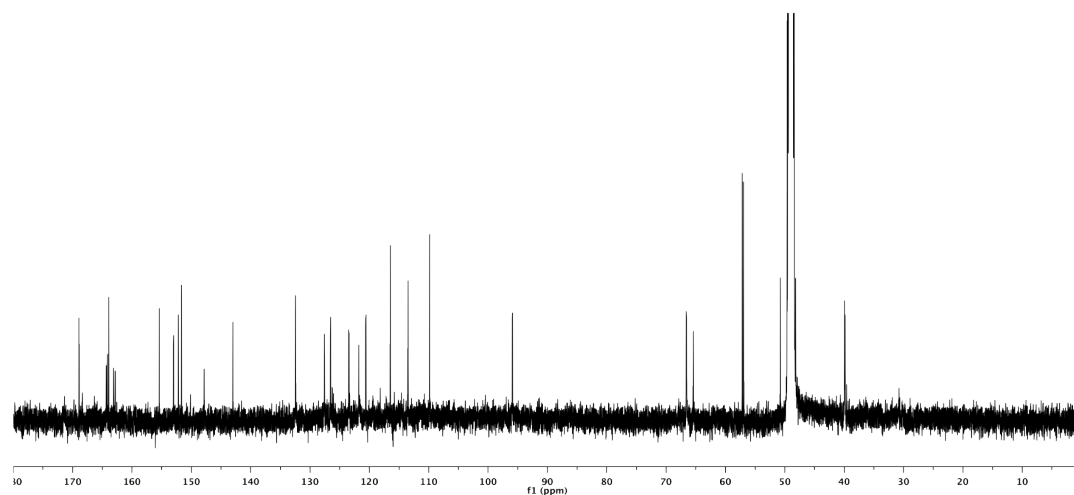

**[C]-PDS**  $^{13}\text{C}$  NMR spectrum

# **Kinetic of photo-deprotection of [C]-PDS:**

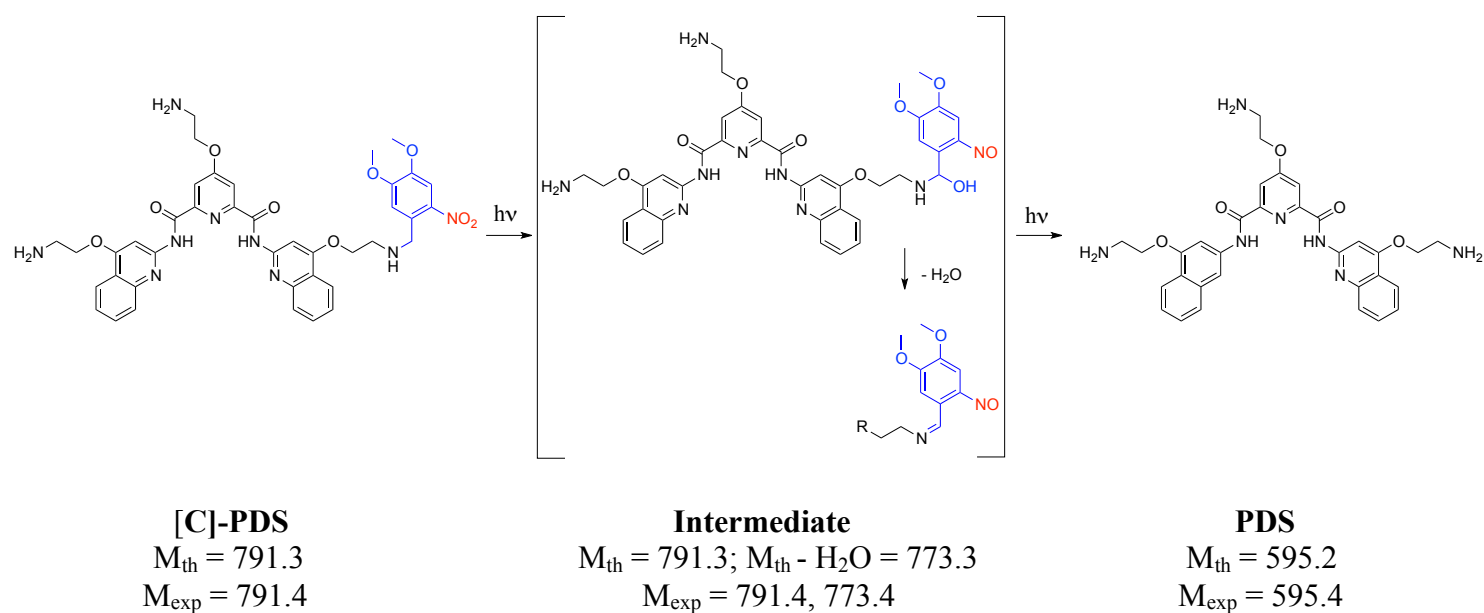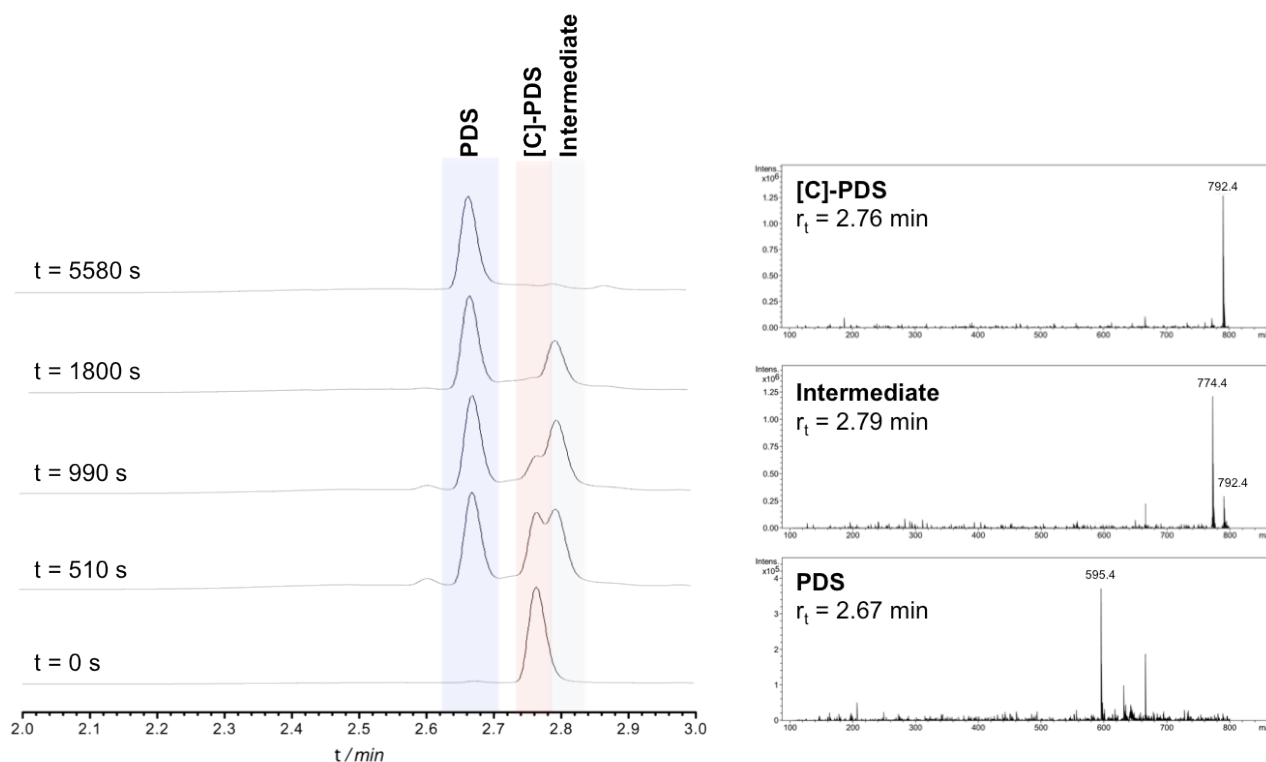

**Figure S1.** Kinetic of photo-deprotection of [C]-PDS followed by tandem HPLC-MS analysis.

## Cell viability assay in presence of PDS and [C]-PDS.

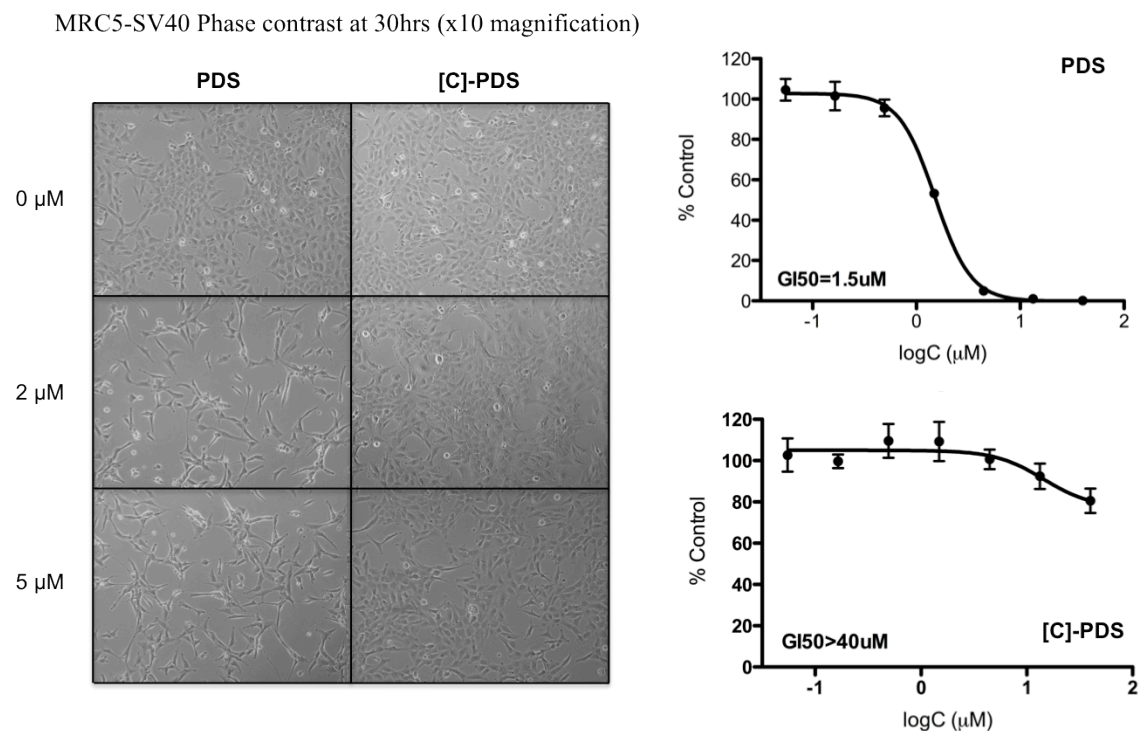

**Figure S2.** MRC5-SV40 cell viability assay for the determination of **PDS** and **[C]-PDS** GI 50. Cell viability was measured 72 h after incubation with small molecules.

## Influence of UV light on MRC5-SV40 cells viability.

| Irradiation time (min) | Number of viable cells | p-value |
|------------------------|------------------------|---------|
| 0                      | 211004 $\pm$ 1779      |         |
| 8                      | 204076 $\pm$ 792       | ns      |
| 15                     | 197554 $\pm$ 6291      | ns      |
| 30                     | 195456 $\pm$ 11513     | ns      |

**Table S1.** Number of viable cells at 72 h after irradiation for different irradiation times in the absence of any added molecule. p-values have been calculated to check the relevance of changes in quantity of cells. ns : not statically relevant.

### Influence of UV light on gene expression.

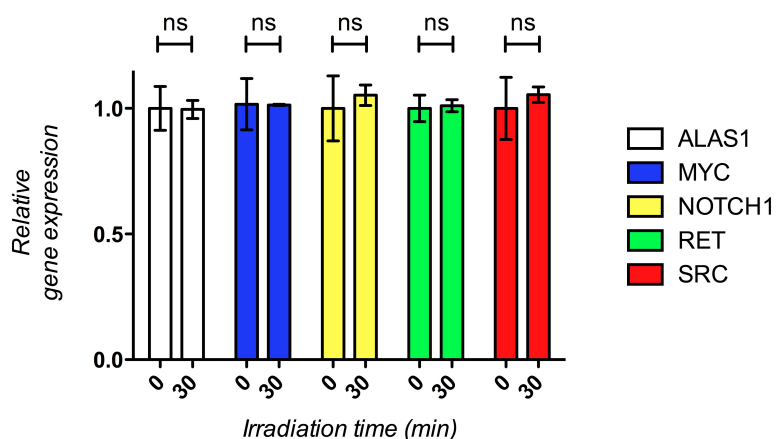

**Figure S3.** Relative gene expression of untreated MRC5-SV40 cells for 0 or 30 min of 365nm irradiation. The expression data for each gene is normalized to the housekeeping gene *B2M*. These results are the combination of biological triplicate and error bars represent the standard deviation. ns: not statically relevant.

### Light-mediated downregulation of mRNAs of quadruplex-containing genes.

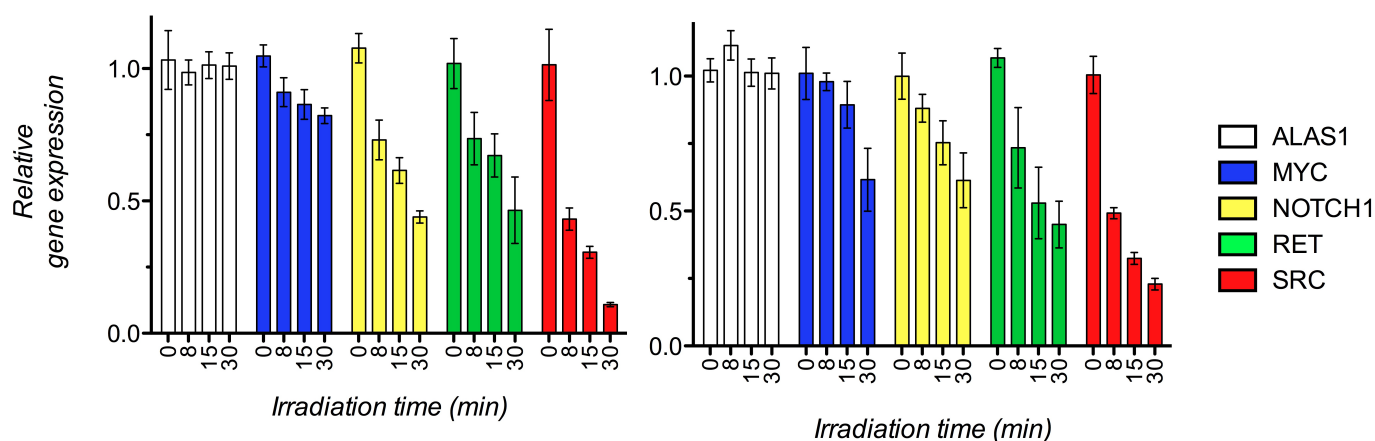

**Figure S4.** Three independent replicates showing the light-mediated down regulation of mRNAs of quadruplex-containing genes by 2  $\mu$ M [C]-PDS in MRC5-SV40 cells for different time of 365 nm irradiation. The expression data for each gene is normalized to the housekeeping gene *B2M*. These results are the combination of technical triplicates and error bars represent the standard deviation.

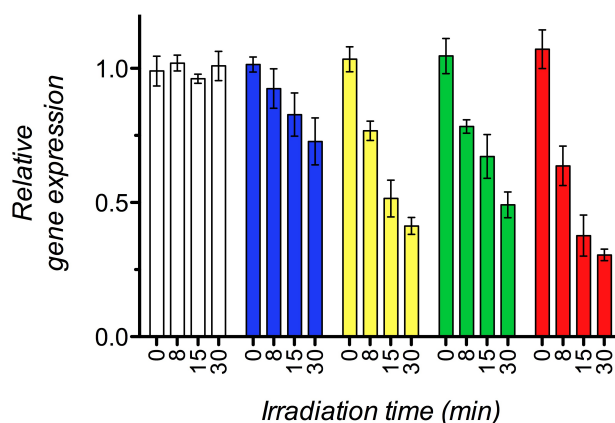

Supplement: c3cc44737e.pdf [file c3cc44737e.pdf]
